# Supplementary material for: Different responses of plant N and P resorption to overgrazing in three dominant species in a typical steppe of Inner Mongolia, China
Source: PeerJ. 2020 Sep 18;8:e9915. doi: 10.7717/peerj.9915 (PMC7505080; doi:10.7717/peerj.9915)
Supplement: Supplemental Information 1 [file peerj-08-9915-s001.xlsx]

## Sheet: Sheet1
Biomass
green leaves										senesced leaves
Year	Treatment	Replicate	ANPP(g m-2)	L. chinensis(g m-2)	S. grandis(g m-2)	C. squarrosa (g m-2)				Year	Treatment	Replicate	L. chinensis(g m-2)	S. grandis(g m-2)	C. squarrosa (g m-2)
2013	Enclosure	1	155.45	60.29	27.39	9.55				2013	Enclosure	1	51.9439	23.56	8.13
2013	Enclosure	2	157.39	70.93	28.47	8.76				2013	Enclosure	2	55.7018	23.18	7.34
2013	Enclosure	3	167.32	76.93	25.32	8.82				2013	Enclosure	3	62.516	22.63	7.26
2013	Enclosure	4	154.21	67.26	30.85	8.34				2013	Enclosure	4	55.3293	26.67	7.41
2013	Enclosure	5	150.46	57.11	32.88	7.25				2013	Enclosure	5	43.2566	21.82	6.32
2013	Enclosure	6	161.76	69.29	24.72	7.64				2013	Enclosure	6	48.6042	22.55	6.56
2013	Enclosure	7	151.4	60.12	24.65	10.18				2013	Enclosure	7	47.9743	22.92	8.88
2013	Enclosure	8	154.13	68.85	26.83	8.99				2013	Enclosure	8	52.3049	23.83	7.24
2013	Enclosure	9	152.91	58.96	27.29	9.14				2013	Enclosure	9	45.7659	21.78	7.76
2013	Enclosure	10	145.48	67.15	24.79	7.12				2013	Enclosure	10	55.1643	22.68	6.28
2013	Enclosure	11	153.47	62.88	26.93	7.83				2013	Enclosure	11	51.1003	23.57	6.65
2013	Enclosure	12	155.04	55.56	28.78	8.15				2013	Enclosure	12	44.8	25.69	7.57
2013	Enclosure	13	161.23	66.29	30.59	9.76				2013	Enclosure	13	52.1833	25.88	8.44
2013	Enclosure	14	166.67	71.32	29.63	8.96				2013	Enclosure	14	57.5626	23.62	7.35
2013	Enclosure	15	149.62	64.76	26.75	9.54				2013	Enclosure	15	53.6944	22.62	8.66
2013	Grazing	1	63.24	20.12	20.75	9.32				2013	Grazing	1	19.6455	15.01	7.95
2013	Grazing	2	60.41	21.94	18.45	8.89				2013	Grazing	2	20.0551	13.85	7.22
2013	Grazing	3	57.65	21.53	17.82	8.13				2013	Grazing	3	20.4797	12.59	7.03
2013	Grazing	4	56.98	19.83	19.64	9.82				2013	Grazing	4	16.7912	13.92	7.57
2013	Grazing	5	55.09	18.55	16.85	7.95				2013	Grazing	5	16.2681	12.67	6.92
2013	Grazing	6	65.48	20.03	21.22	9.21				2013	Grazing	6	18.0974	14.04	7.97
2013	Grazing	7	59.58	23.01	17.83	7.39				2013	Grazing	7	21.9837	13.22	6.82
2013	Grazing	8	54.69	18.92	18.78	7.17				2013	Grazing	8	18.271	12.96	6.17
2013	Grazing	9	56.06	18.75	15.94	8.65				2013	Grazing	9	19.1217	10.79	7.49
2013	Grazing	10	56.56	19.42	18.47	8.05				2013	Grazing	10	18.6681	12.92	7.02
2013	Grazing	11	58.38	20.01	20.22	9.37				2013	Grazing	11	18.4039	14.08	8.33
2013	Grazing	12	59.32	19.56	21.67	8.83				2013	Grazing	12	17.5666	14.55	7.27
2013	Grazing	13	63.01	21.88	22.14	8.2				2013	Grazing	13	20.3198	14.34	7.51
2013	Grazing	14	58.44	19.62	17.78	8.91				2013	Grazing	14	17.7158	12.58	7.16
2013	Grazing	15	51.57	17.15	16.66	7.75				2013	Grazing	15	15.1263	12.01	6.82
2014	Enclosure	1	139.02	57.55	17.02	7.23				2014	Enclosure	1	48.89	13.39	6.31
2014	Enclosure	2	149.27	64.95	23.85	8.15				2014	Enclosure	2	55.46	19.75	7.22
2014	Enclosure	3	154.92	62.93	26.78	6.78				2014	Enclosure	3	52.74	22.96	5.47
2014	Enclosure	4	157.57	65.36	27.67	8.42				2014	Enclosure	4	55.88	20.22	7.43
2014	Enclosure	5	142.75	53.11	29.35	6.93				2014	Enclosure	5	43.92	25.17	5.83
2014	Enclosure	6	155.11	62.42	28.83	8.11				2014	Enclosure	6	51.57	22.83	7.34
2014	Enclosure	7	144.19	60.36	25.37	7.82				2014	Enclosure	7	49.66	20.45	6.75
2014	Enclosure	8	152	61.67	26.65	7.45				2014	Enclosure	8	50.65	21.07	6.66
2014	Enclosure	9	134.09	55.33	27.17	7.37				2014	Enclosure	9	44.82	23.88	6.54
2014	Enclosure	10	138.52	63.27	25.77	6.59				2014	Enclosure	10	52.59	22.62	6.18
2014	Enclosure	11	135.25	56.62	23.45	8.33				2014	Enclosure	11	45.54	18.62	7.56
2014	Enclosure	12	139.97	52.69	30.28	7.55				2014	Enclosure	12	41.09	24.15	6.71
2014	Enclosure	13	145.82	63.66	23.33	7.17				2014	Enclosure	13	51.58	19.56	6.32
2014	Enclosure	14	135.98	65.06	22.69	6.78				2014	Enclosure	14	55.28	17.26	5.76
2014	Enclosure	15	136.18	61.17	24.67	7.56				2014	Enclosure	15	50.59	20.68	6.59
2014	Grazing	1	43.65	11.15	17.24	6.27				2014	Grazing	1	9.25	11.65	5.81
2014	Grazing	2	43.94	10.27	15.78	7.13				2014	Grazing	2	8.28	10.72	6.26
2014	Grazing	3	42.82	9.86	18.22	6.96				2014	Grazing	3	8.04	13.04	6.02
2014	Grazing	4	43.99	10.82	15.85	6.07				2014	Grazing	4	7.55	10.42	5.72
2014	Grazing	5	45.08	9.35	16.92	6.68				2014	Grazing	5	6.92	11.73	5.63
2014	Grazing	6	49.58	13.29	18.68	7.39				2014	Grazing	6	9.07	12.55	6.17
2014	Grazing	7	54.77	15.12	19.16	7.77				2014	Grazing	7	10.59	14.94	5.99
2014	Grazing	8	48.16	12.45	17.88	7.01				2014	Grazing	8	10.36	13.69	6.34
2014	Grazing	9	41.77	10.96	14.67	6.99				2014	Grazing	9	8.62	10.74	6.09
2014	Grazing	10	49.85	15.86	16.12	6.75				2014	Grazing	10	10.63	11.69	5.93
2014	Grazing	11	42.17	11.95	15.15	6.96				2014	Grazing	11	8.72	9.32	5.94
2014	Grazing	12	45.21	14.69	14.52	6.82				2014	Grazing	12	9.81	8.99	6.02
2014	Grazing	13	52.07	16.09	17.78	7.52				2014	Grazing	13	10.41	12.32	6.81
2014	Grazing	14	51.33	13.54	21.12	7.89				2014	Grazing	14	7.87	13.75	6.99
2014	Grazing	15	51.53	14.26	18.82	8.16				2014	Grazing	15	8.69	12.95	6.79
