# Supplementary material for: Different responses of plant N and P resorption to overgrazing in three dominant species in a typical steppe of Inner Mongolia, China
Source: PeerJ. 2020 Sep 18;8:e9915. doi: 10.7717/peerj.9915 (PMC7505080; doi:10.7717/peerj.9915)
Supplement: Supplemental Information 4 [file peerj-08-9915-s004.xlsx]

## Sheet: Sheet1
L. chinensis								S. grandis								C. squarrosa
Year	Treatment	Replicate	NRE	PRE				Year	Treatment	Replicate	NRE	PRE				Year	Treatment	Replicate	NRE	PRE
2013	Enclosure	1	64.3425	52.0071				2013	Enclosure	1	63.2684	59.0142				2013	Enclosure	1	53.2044	52.381
2013	Enclosure	2	66.6422	62.1504				2013	Enclosure	2	62.9394	57.6801				2013	Enclosure	2	55.8707	49.4622
2013	Enclosure	3	64.6986	62.293				2013	Enclosure	3	62.5738	56.1552				2013	Enclosure	3	56.7895	57.8719
2013	Enclosure	4	64.2636	62.979				2013	Enclosure	4	68.5401	61.0774				2013	Enclosure	4	50.1323	45.7833
2013	Enclosure	5	67.7232	61.6124				2013	Enclosure	5	63.9914	67.619				2013	Enclosure	5	56.9534	57.3856
2013	Enclosure	6	67.1085	70.9716				2013	Enclosure	6	65.4648	56.4495				2013	Enclosure	6	54.5194	44.0777
2013	Enclosure	7	63.1865	62.3486				2013	Enclosure	7	57.8847	50.8633				2013	Enclosure	7	56.2764	50.3961
2013	Enclosure	8	65.8716	64.5477				2013	Enclosure	8	58.5514	51.8702				2013	Enclosure	8	58.0005	59.605
2013	Enclosure	9	62.9632	56.4772				2013	Enclosure	9	63.2016	57.4397				2013	Enclosure	9	55.433	45.6548
2013	Enclosure	10	61.0798	65.3048				2013	Enclosure	10	52.1998	54.7448				2013	Enclosure	10	56.9448	50.1859
2013	Enclosure	11	63.2372	64.1718				2013	Enclosure	11	63.5773	56.904				2013	Enclosure	11	54.9132	44.1678
2013	Enclosure	12	62.5326	67.6715				2013	Enclosure	12	49.572	55.9131				2013	Enclosure	12	48.3438	44.1337
2013	Enclosure	13	63.0598	66.5067				2013	Enclosure	13	61.4532	60.2138				2013	Enclosure	13	58.4027	50.8678
2013	Enclosure	14	61.2181	62.2566				2013	Enclosure	14	55.5603	61.4853				2013	Enclosure	14	59.4606	46.8171
2013	Enclosure	15	62.9079	60.6291				2013	Enclosure	15	57.228	54.4293				2013	Enclosure	15	54.4168	50.5713
2013	Grazing	1	73.4431	65.1683				2013	Grazing	1	66.9963	63.0881				2013	Grazing	1	55.5489	44.7396
2013	Grazing	2	75.604	65.6571				2013	Grazing	2	67.6085	63.8196				2013	Grazing	2	56.5706	47.2362
2013	Grazing	3	73.556	68.2928				2013	Grazing	3	66.0176	64.351				2013	Grazing	3	52.6726	41.3421
2013	Grazing	4	74.5414	76.502				2013	Grazing	4	65.4585	71.8714				2013	Grazing	4	56.8719	51.3161
2013	Grazing	5	73.7193	73.9684				2013	Grazing	5	71.9827	70.6754				2013	Grazing	5	47.1838	45.0176
2013	Grazing	6	75.4316	70.9788				2013	Grazing	6	72.8251	72.0889				2013	Grazing	6	50.317	45.5389
2013	Grazing	7	71.9176	63.3592				2013	Grazing	7	65.954	65.7073				2013	Grazing	7	45.7133	37.5312
2013	Grazing	8	75.6084	63.3773				2013	Grazing	8	72.3224	64.6447				2013	Grazing	8	50.2737	41.9418
2013	Grazing	9	76.1039	51.0279				2013	Grazing	9	75.3209	68.4853				2013	Grazing	9	53.7209	47.3469
2013	Grazing	10	76.0924	54.4474				2013	Grazing	10	66.7829	69.4712				2013	Grazing	10	54.0012	43.2281
2013	Grazing	11	73.7362	61.5906				2013	Grazing	11	71.9276	65.183				2013	Grazing	11	57.0649	38.3214
2013	Grazing	12	73.299	65.4435				2013	Grazing	12	67.5112	70.1191				2013	Grazing	12	56.8339	48.4451
2013	Grazing	13	74.4328	65.8226				2013	Grazing	13	75.1167	74.919				2013	Grazing	13	51.9663	41.5536
2013	Grazing	14	74.0065	64.1903				2013	Grazing	14	63.67	67.7802				2013	Grazing	14	56.5003	50.5057
2013	Grazing	15	74.1236	59.3839				2013	Grazing	15	63.5915	65.7352				2013	Grazing	15	53.5523	46.2382
2014	Enclosure	1	63.9832	61.5083				2014	Enclosure	1	60.8995	65.801				2014	Enclosure	1	59.9757	55.7227
2014	Enclosure	2	62.6558	67.0534				2014	Enclosure	2	58.3504	65.3374				2014	Enclosure	2	55.7055	59.5975
2014	Enclosure	3	62.9793	66.0141				2014	Enclosure	3	66.3877	58.6479				2014	Enclosure	3	60.9135	62.2314
2014	Enclosure	4	59.3967	66.7934				2014	Enclosure	4	65.2666	74.5384				2014	Enclosure	4	50.788	56.644
2014	Enclosure	5	63.9321	62.703				2014	Enclosure	5	58.8135	65.8205				2014	Enclosure	5	56.2312	49.4402
2014	Enclosure	6	61.7845	67.3797				2014	Enclosure	6	61.6668	66.5878				2014	Enclosure	6	55.0215	59.5865
2014	Enclosure	7	60.2216	68.1258				2014	Enclosure	7	59.9408	60.4541				2014	Enclosure	7	54.9414	49.4539
2014	Enclosure	8	62.4998	67.0244				2014	Enclosure	8	64.2339	62.6834				2014	Enclosure	8	52.9495	49.093
2014	Enclosure	9	61.69	64.6017				2014	Enclosure	9	54.0698	69.5055				2014	Enclosure	9	60.6856	55.8824
2014	Enclosure	10	64.4031	61.4517				2014	Enclosure	10	57.2517	68.9455				2014	Enclosure	10	58.1951	49.6021
2014	Enclosure	11	63.8618	69.6185				2014	Enclosure	11	59.5097	69.0536				2014	Enclosure	11	51.3594	59.2898
2014	Enclosure	12	64.5031	68.9313				2014	Enclosure	12	58.2977	67.2498				2014	Enclosure	12	50.4929	60.3788
2014	Enclosure	13	61.1232	64.4606				2014	Enclosure	13	59.9729	64.8734				2014	Enclosure	13	51.4072	55.8529
2014	Enclosure	14	61.3963	60.3412				2014	Enclosure	14	58.0647	64.276				2014	Enclosure	14	55.6038	55.5372
2014	Enclosure	15	62.4802	60.8334				2014	Enclosure	15	55.7143	60.948				2014	Enclosure	15	59.7256	57.0882
2014	Grazing	1	74.3542	59.1248				2014	Grazing	1	66.785	68.3921				2014	Grazing	1	49.1259	38.935
2014	Grazing	2	73.6084	65.1104				2014	Grazing	2	69.0125	73.4008				2014	Grazing	2	49.3473	44.9053
2014	Grazing	3	72.2303	61.8431				2014	Grazing	3	67.1972	65.3466				2014	Grazing	3	53.5494	46.5014
2014	Grazing	4	75.4428	63.2615				2014	Grazing	4	68.1018	69.8139				2014	Grazing	4	48.5433	34.6277
2014	Grazing	5	74.6118	67.4128				2014	Grazing	5	66.9306	68.9873				2014	Grazing	5	59.8902	44.3938
2014	Grazing	6	76.9018	65.5937				2014	Grazing	6	68.9617	72.3288				2014	Grazing	6	52.4417	47.1015
2014	Grazing	7	77.1486	60.4168				2014	Grazing	7	61.952	67.8066				2014	Grazing	7	59.4016	53.4627
2014	Grazing	8	72.6238	51.5981				2014	Grazing	8	64.1234	63.3994				2014	Grazing	8	49.279	36.5043
2014	Grazing	9	72.3515	63.1223				2014	Grazing	9	63.8154	60.8206				2014	Grazing	9	50.6295	46.2501
2014	Grazing	10	75.6957	70.6653				2014	Grazing	10	65.1747	72.0159				2014	Grazing	10	51.9816	47.5564
2014	Grazing	11	74.4803	70.7601				2014	Grazing	11	72.1022	68.1584				2014	Grazing	11	46.5869	44.7252
2014	Grazing	12	77.1213	66.4057				2014	Grazing	12	72.7281	67.6869				2014	Grazing	12	53.7122	45.4974
2014	Grazing	13	78.149	74.3525				2014	Grazing	13	71.3277	71.8432				2014	Grazing	13	48.0875	45.1939
2014	Grazing	14	79.2547	78.0594				2014	Grazing	14	71.7262	72.7171				2014	Grazing	14	48.5052	47.6561
2014	Grazing	15	80.2188	77.1909				2014	Grazing	15	66.768	65.3139				2014	Grazing	15	47.588	45.201
